# Supplementary material for: Impacts of anemometer changes, site relocations and processing methods on wind speed trends in China
Source: Copernicus journal article supplement (doi:10.5194/amt-17-1123-2024), 2024-02-16
Supplement: Supplementary file 1 [file amt-17-1123-2024-supplement.pdf]

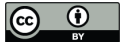

*Supplement of*

## **Impacts of anemometer changes, site relocations and processing methods on wind speed trends in China**

**Yi Liu et al.**

*Correspondence to:* Rongrong Xu ([xurr@sustech.edu.cn](mailto:xurr@sustech.edu.cn)) and Zhenzhong Zeng ([zengzz@sustech.edu.cn](mailto:zengzz@sustech.edu.cn))

The copyright of individual parts of the supplement might differ from the article licence.

18 **Table S1. Number of stations left after applying each WMO criteria.**

| Criteria               | Number of stations left |
|------------------------|-------------------------|
| Original               | 840                     |
| a) criteria 3          | 689                     |
| b) criteria 1 and 3    | 641                     |
| c) criteria 1, 2 and 3 | 601                     |

19 \*The three WMO criteria used are: (1) <11 missing daily values in a month; (2) <5  
20 consecutive missing daily values in a month; (3) complete monthly values for every  
21 month during the study period.

22

23 **Table S2. Relocated stations details.**

| Change                            | Number of stations |
|-----------------------------------|--------------------|
| Latitude or longitude             | 311                |
| Altitude                          | 218                |
| Latitude or longitude or altitude | 432                |

24

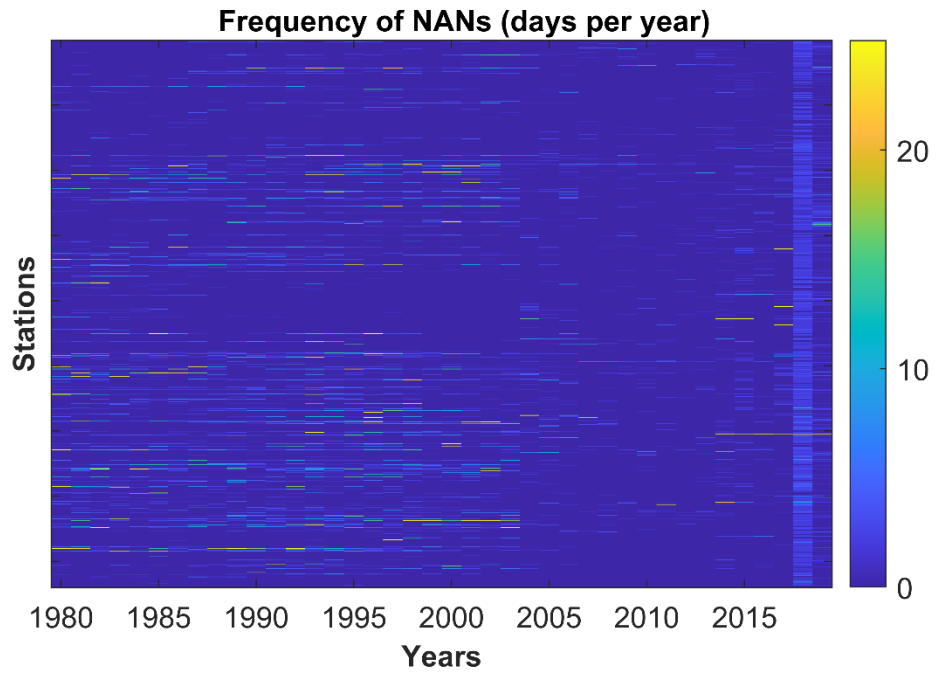

25

26 **Figure S1. Frequency of NaNs (days per year) for 840 stations in CSD from 1980**  
27 **until 2019.** Each row represents one station.

28

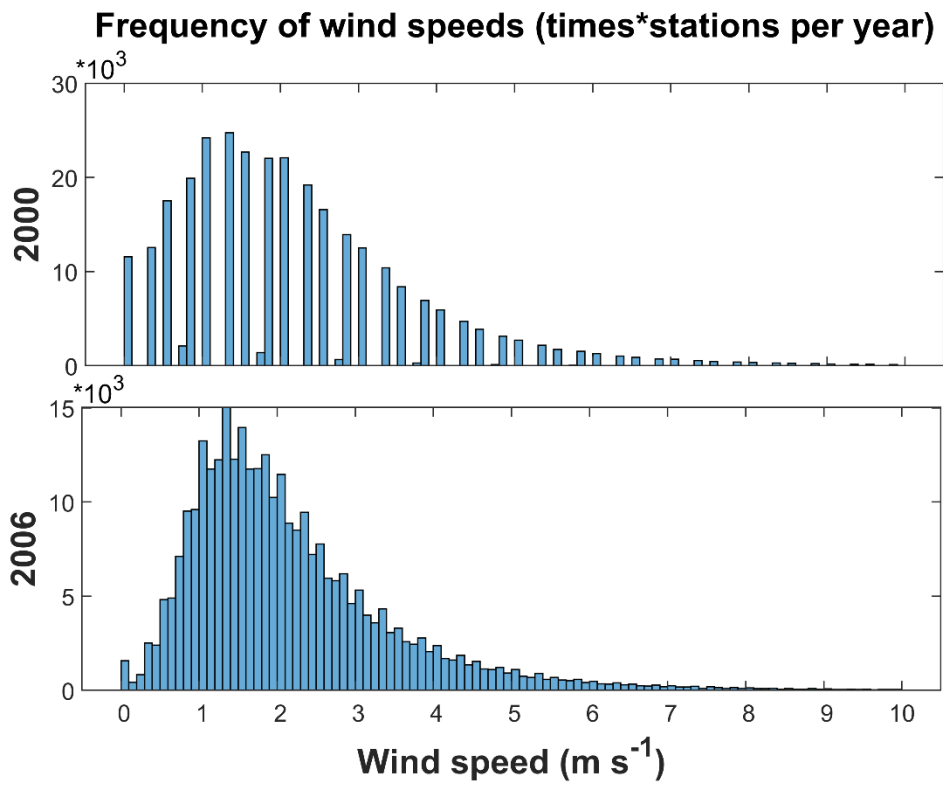

29

30 **Figure S2. Change in wind speed data caused by updates in anemometer changes**  
 31 **and processing methods.** Daily wind speed distribution of all stations in 2000 (old  
 32 system) versus 2006 (new system).

33

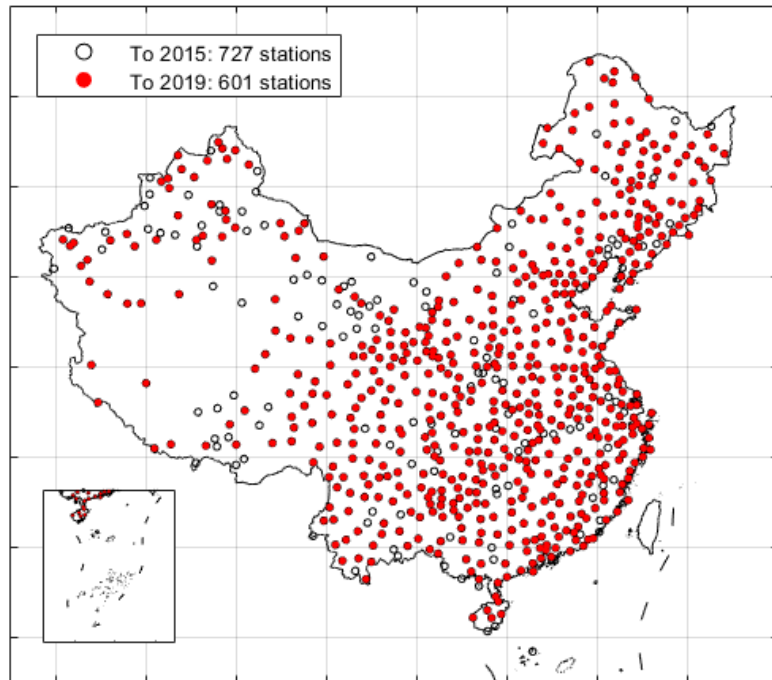

34

35 **Figure S3. Distribution of stations that passed the WMO criteria.** The black hollow  
36 circles are the 727 stations till 2015 and the filled red circles are the 601 stations till  
37 2019. Maps information are from Department of Natural Resources standard map  
38 service system of China.

39

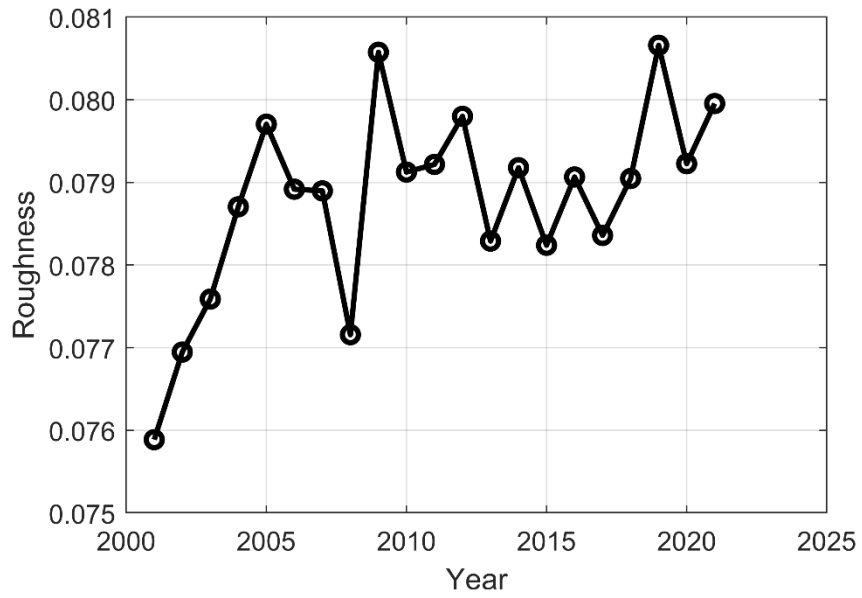

40  
41 **Figure S4. Surface roughness change around station 52974.** The roughness is  
42 evaluated by  $u^*/U_h$  described in Chappell & Webb (2016).  
43

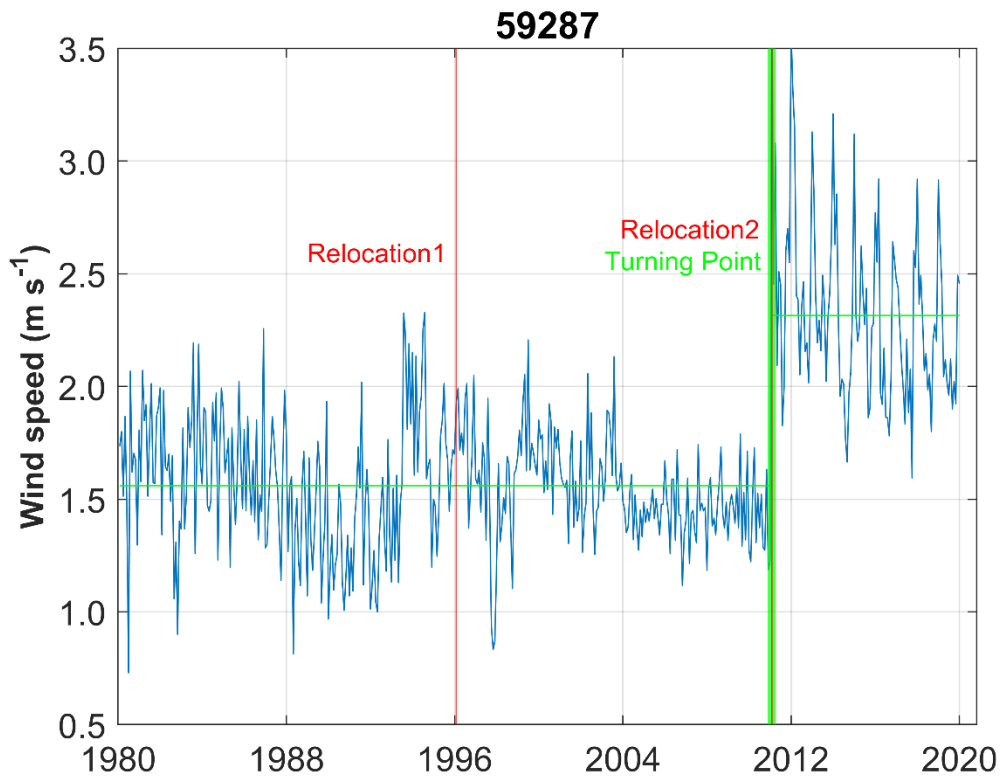

45

46 **Figure S5. Time series of Station 59287 (Guangzhou) and the two relocations.** The  
47 blue line is the monthly wind speed. The two red lines are the relocations and the thick  
48 green line is the detected turning point in 2011.

49



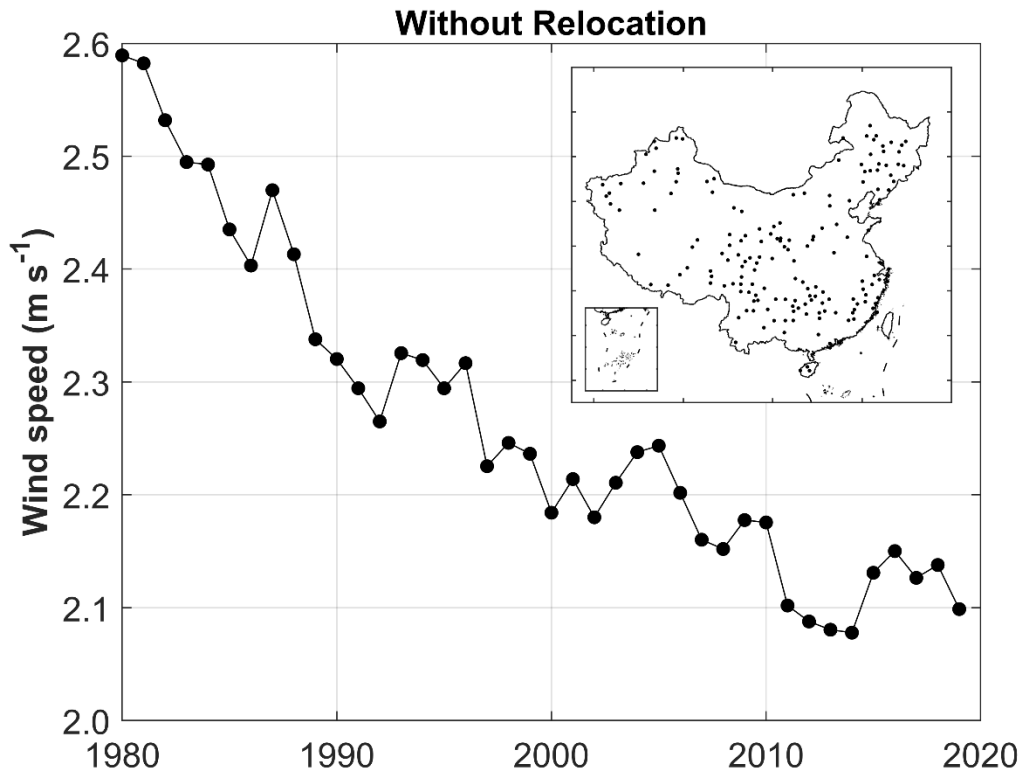

50

51 **Figure S6. Averaged annual wind speed of 169 stations without relocation.** The  
 52 inset shows the station distribution across China. Maps information are from  
 53 Department of Natural Resources standard map service system of China.

54

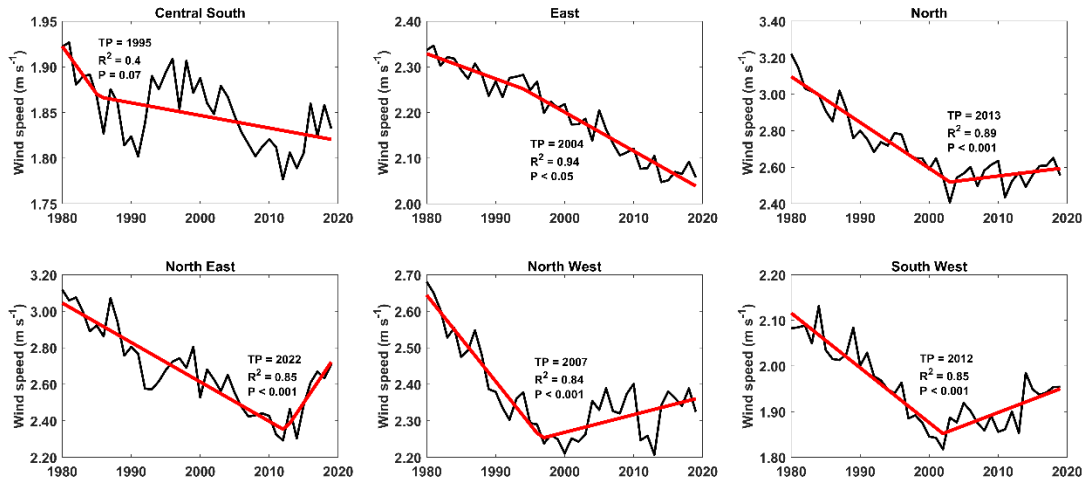

55

56 **Figure S7. Regional wind speed trends.** The regional division is consistent with  
 57 Figure 2a in Liu et al (2022).

58
